# Supplementary material for: New insight into the plastic deformation mechanisms during the SiO2 phase transition process
Source: Royal Society of Chemistry journal article supplement (doi:10.1039/d3ra07633d), 2024-01-01
Supplement: d3ra07633d1.pdf [file d3ra07633d1.pdf]

## Support information

### **New insight into the plastic deformation mechanisms during SiO<sub>2</sub> phase transition process**

Zhenlun Wei<sup>a</sup>, Yubiao Li<sup>a,b\*</sup>, Peiyue Li<sup>c,d</sup>, Li Pan<sup>d</sup>, Wanqing Li<sup>a</sup>, Xianglin Hu<sup>a</sup>,  
Yunxiang Gu<sup>a</sup>

<sup>a</sup> *School of Resources and Environmental Engineering, Wuhan University of Technology, Wuhan 430070, Hubei, China;*

<sup>b</sup> *Key Laboratory of Green Utilization of Critical Non-metallic Mineral Resources, Ministry of Education, Wuhan 430070, Hubei, China;*

<sup>c</sup> *(Anhui) National Innovation Center for Advanced Glass Materials, Bengbu, Anhui, 233018, PR China;*

<sup>d</sup> *CNBM Research Institute for Advanced Glass Materials Group Co., Ltd, Bengbu, 233018, PR China.*

\*Corresponding author. Email: yubiao.li@whut.edu.cn (Y. Li)

Address: 122, Luoshi Road, Hongshan District, Wuhan, Hubei, China, 430070

**This supporting information contains 15 pages, 3 figures and 5 tables.**

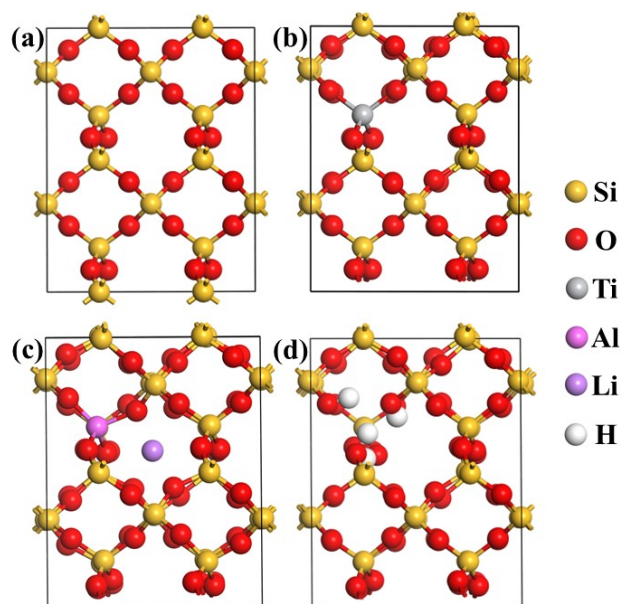

**Fig.S1** Structures of optimized and  $\text{Ti}^{4+}$ ,  $\text{Al}^{3+}/\text{Li}^{+}$  and  $4\text{H}^{+}$  substituted  $2\times 2\times 2$   $\beta$ -quartz supercells: (a)  $\text{Si}_{24}\text{O}_{48}$ ; (b)  $\text{Si}_{23}\text{TiO}_{48}$ ; (c)  $\text{Si}_{23}\text{AlLiO}_{48}$ ; (d)  $\text{Si}_{23}\text{H}_4\text{O}_{48}$

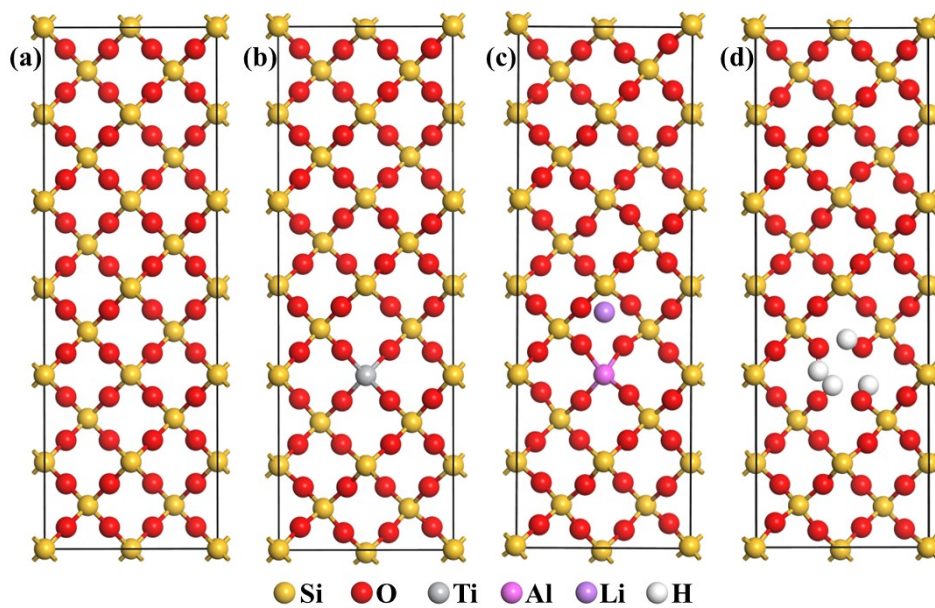

**Fig.S2** Structures of optimized and  $\text{Ti}^{4+}$ ,  $\text{Al}^{3+}/\text{Li}^+$  and  $4\text{H}^+$  substituted  $3\times 1\times 1$   $\beta$ -cristobalite supercells: (a)  $\text{Si}_{24}\text{O}_{48}$ ; (b)  $\text{Si}_{23}\text{TiO}_{48}$ ; (c)  $\text{Si}_{23}\text{AlLiO}_{48}$ ; (d)  $\text{Si}_{23}\text{H}_4\text{O}_{48}$

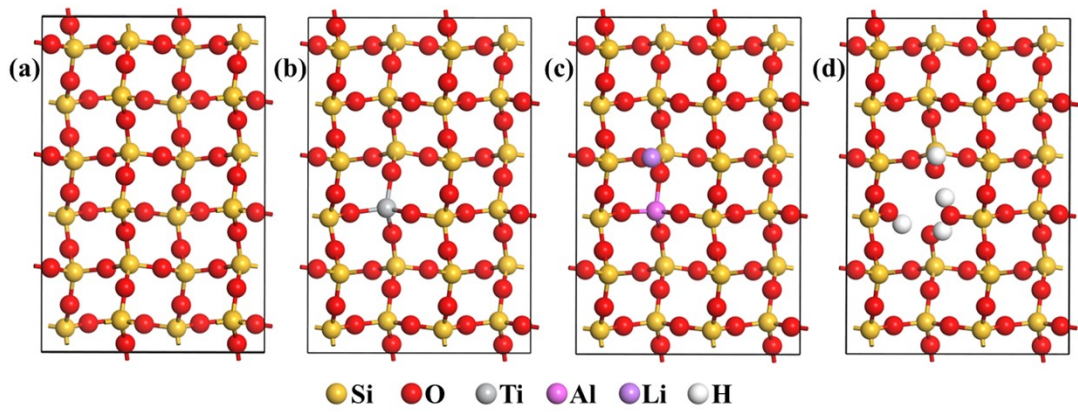

**Fig.S3** Structures of optimized and  $\text{Ti}^{4+}$ ,  $\text{Al}^{3+}/\text{Li}^{+}$  and  $4\text{H}^{+}$  substituted  $3 \times 2 \times 1$   $\alpha$ -cristobalite supercells: (a)  $\text{Si}_{24}\text{O}_{48}$ ; (b)  $\text{Si}_{23}\text{TiO}_{48}$ ; (c)  $\text{Si}_{23}\text{AlLiO}_{48}$ ; (d)  $\text{Si}_{23}\text{H}_4\text{O}_{48}$

**Table S1** The xyz coordinates for transition state structures in original SiO<sub>2</sub> phases, TS1 was the transition state between  $\alpha$ -quartz and  $\beta$ -quartz, TS2 was the transition state between  $\beta$ -quartz and  $\beta$ -cristobalite, TS3 was the transition state between  $\beta$ -cristobalite and  $\alpha$ -cristobalite.

| Atom number | TS1      |          |           | TS2      |          |          | TS3      |          |          |
|-------------|----------|----------|-----------|----------|----------|----------|----------|----------|----------|
|             | x        | y        | z         | x        | y        | z        | x        | y        | z        |
| Si1         | 0.250000 | 0.000000 | -0.000041 | 0.000000 | 0.000000 | 0.000000 | 0.099836 | 0.149763 | 0.000001 |
| Si2         | 0.000000 | 0.250000 | 0.333374  | 0.000000 | 0.500000 | 0.500000 | 0.233498 | 0.350237 | 0.500001 |
| Si3         | 0.250000 | 0.250000 | 0.166667  | 0.166673 | 0.000000 | 0.500000 | 0.066831 | 0.399763 | 0.249999 |
| Si4         | 0.750000 | 0.000000 | -0.000041 | 0.166673 | 0.500000 | 0.000000 | 0.266502 | 0.100237 | 0.749999 |
| Si5         | 0.500000 | 0.250000 | 0.333374  | 0.250000 | 0.250000 | 0.750000 | 0.433169 | 0.149763 | 0.000001 |
| Si6         | 0.750000 | 0.250000 | 0.166667  | 0.083327 | 0.250000 | 0.250000 | 0.566831 | 0.350237 | 0.500001 |
| Si7         | 0.250000 | 0.500000 | -0.000041 | 0.083327 | 0.750000 | 0.750000 | 0.400165 | 0.399763 | 0.249999 |
| Si8         | 0.000000 | 0.750000 | 0.333374  | 0.250000 | 0.750000 | 0.250000 | 0.599835 | 0.100237 | 0.749999 |
| Si9         | 0.250000 | 0.750000 | 0.166667  | 0.333327 | 0.000000 | 0.000000 | 0.766502 | 0.149763 | 0.000001 |
| Si10        | 0.750000 | 0.500000 | -0.000041 | 0.333327 | 0.500000 | 0.500000 | 0.900164 | 0.350237 | 0.500001 |
| Si11        | 0.500000 | 0.750000 | 0.333374  | 0.500000 | 0.000000 | 0.500000 | 0.733498 | 0.399763 | 0.249999 |
| Si12        | 0.750000 | 0.750000 | 0.166667  | 0.500000 | 0.500000 | 0.000000 | 0.933169 | 0.100237 | 0.749999 |
| Si13        | 0.250000 | 0.000000 | 0.499959  | 0.583327 | 0.250000 | 0.750000 | 0.099836 | 0.649763 | 0.000001 |
| Si14        | 0.000000 | 0.250000 | 0.833374  | 0.416673 | 0.250000 | 0.250000 | 0.233498 | 0.850237 | 0.500001 |
| Si15        | 0.250000 | 0.250000 | 0.666667  | 0.416673 | 0.750000 | 0.750000 | 0.066831 | 0.899763 | 0.249999 |
| Si16        | 0.750000 | 0.000000 | 0.499959  | 0.583327 | 0.750000 | 0.250000 | 0.266502 | 0.600237 | 0.749999 |
| Si17        | 0.500000 | 0.250000 | 0.833374  | 0.666673 | 0.000000 | 0.000000 | 0.433169 | 0.649763 | 0.000001 |
| Si18        | 0.750000 | 0.250000 | 0.666667  | 0.666673 | 0.500000 | 0.500000 | 0.566831 | 0.850237 | 0.500001 |
| Si19        | 0.250000 | 0.500000 | 0.499959  | 0.833327 | 0.000000 | 0.500000 | 0.400165 | 0.899763 | 0.249999 |
| Si20        | 0.000000 | 0.750000 | 0.833374  | 0.833327 | 0.500000 | 0.000000 | 0.599835 | 0.600237 | 0.749999 |
| Si21        | 0.250000 | 0.750000 | 0.666667  | 0.916673 | 0.250000 | 0.750000 | 0.766502 | 0.649763 | 0.000001 |
| Si22        | 0.750000 | 0.500000 | 0.499959  | 0.750000 | 0.250000 | 0.250000 | 0.900164 | 0.850237 | 0.500001 |
| Si23        | 0.500000 | 0.750000 | 0.833374  | 0.750000 | 0.750000 | 0.750000 | 0.733498 | 0.899763 | 0.249999 |
| Si24        | 0.750000 | 0.750000 | 0.666667  | 0.916673 | 0.750000 | 0.250000 | 0.933169 | 0.600237 | 0.749999 |
| O1          | 0.204849 | 0.102237 | 0.083323  | 0.041695 | 0.124980 | 0.124980 | 0.080322 | 0.051959 | 0.178422 |
| O2          | 0.397702 | 0.102298 | 0.416667  | 0.041695 | 0.624980 | 0.624980 | 0.253012 | 0.448041 | 0.678422 |
| O3          | 0.397763 | 0.295151 | 0.250010  | 0.208305 | 0.125020 | 0.625020 | 0.132020 | 0.370489 | 0.428391 |
| O4          | 0.295151 | 0.397763 | 0.083323  | 0.208305 | 0.625020 | 0.125020 | 0.201313 | 0.129511 | 0.928391 |
| O5          | 0.102298 | 0.397702 | 0.416667  | 0.291695 | 0.374980 | 0.625020 | 0.086345 | 0.301959 | 0.071578 |
| O6          | 0.102237 | 0.204849 | 0.250010  | 0.291695 | 0.874980 | 0.125020 | 0.246988 | 0.198041 | 0.571578 |
| O7          | 0.704849 | 0.102237 | 0.083323  | 0.125000 | 0.875000 | 0.625000 | 0.034647 | 0.120489 | 0.821609 |
| O8          | 0.897702 | 0.102298 | 0.416667  | 0.125000 | 0.625000 | 0.875000 | 0.298687 | 0.379511 | 0.321609 |
| O9          | 0.897763 | 0.295151 | 0.250010  | 0.125000 | 0.125000 | 0.375000 | 0.413655 | 0.051959 | 0.178422 |
| O10         | 0.795151 | 0.397763 | 0.083323  | 0.291695 | 0.625020 | 0.374980 | 0.586345 | 0.448041 | 0.678422 |

|     |          |          |          |          |          |          |          |          |          |
|-----|----------|----------|----------|----------|----------|----------|----------|----------|----------|
| O11 | 0.602298 | 0.397702 | 0.416667 | 0.208305 | 0.874980 | 0.374980 | 0.465353 | 0.370489 | 0.428391 |
| O12 | 0.602237 | 0.204849 | 0.250010 | 0.208305 | 0.374980 | 0.874980 | 0.534647 | 0.129511 | 0.928391 |
| O13 | 0.204849 | 0.602237 | 0.083323 | 0.041695 | 0.875020 | 0.875020 | 0.419678 | 0.301959 | 0.071578 |
| O14 | 0.397702 | 0.602298 | 0.416667 | 0.291695 | 0.125020 | 0.874980 | 0.580322 | 0.198041 | 0.571578 |
| O15 | 0.397763 | 0.795151 | 0.250010 | 0.125000 | 0.375000 | 0.125000 | 0.367980 | 0.120489 | 0.821609 |
| O16 | 0.295151 | 0.897763 | 0.083323 | 0.041695 | 0.375020 | 0.375020 | 0.632020 | 0.379511 | 0.321609 |
| O17 | 0.102298 | 0.897702 | 0.416667 | 0.375000 | 0.125000 | 0.125000 | 0.746988 | 0.051959 | 0.178422 |
| O18 | 0.102237 | 0.704849 | 0.250010 | 0.375000 | 0.625000 | 0.625000 | 0.919678 | 0.448041 | 0.678422 |
| O19 | 0.704849 | 0.602237 | 0.083323 | 0.541695 | 0.124980 | 0.624980 | 0.798687 | 0.370489 | 0.428391 |
| O20 | 0.897702 | 0.602298 | 0.416667 | 0.541695 | 0.624980 | 0.124980 | 0.867980 | 0.129511 | 0.928391 |
| O21 | 0.897763 | 0.795151 | 0.250010 | 0.625000 | 0.375000 | 0.625000 | 0.753012 | 0.301959 | 0.071578 |
| O22 | 0.795151 | 0.897763 | 0.083323 | 0.625000 | 0.875000 | 0.125000 | 0.913655 | 0.198041 | 0.571578 |
| O23 | 0.602298 | 0.897702 | 0.416667 | 0.458305 | 0.875020 | 0.624980 | 0.701313 | 0.120489 | 0.821609 |
| O24 | 0.602237 | 0.704849 | 0.250010 | 0.458305 | 0.624980 | 0.875020 | 0.965353 | 0.379511 | 0.321609 |
| O25 | 0.204849 | 0.102237 | 0.583323 | 0.458305 | 0.124980 | 0.375020 | 0.080322 | 0.551959 | 0.178422 |
| O26 | 0.397702 | 0.102298 | 0.916667 | 0.625000 | 0.625000 | 0.375000 | 0.253012 | 0.948041 | 0.678422 |
| O27 | 0.397763 | 0.295151 | 0.750010 | 0.541695 | 0.875020 | 0.375020 | 0.132020 | 0.870489 | 0.428391 |
| O28 | 0.295151 | 0.397763 | 0.583323 | 0.541695 | 0.375020 | 0.875020 | 0.201313 | 0.629511 | 0.928391 |
| O29 | 0.102298 | 0.397702 | 0.916667 | 0.375000 | 0.875000 | 0.875000 | 0.086345 | 0.801959 | 0.071578 |
| O30 | 0.102237 | 0.204849 | 0.750010 | 0.625000 | 0.125000 | 0.875000 | 0.246988 | 0.698041 | 0.571578 |
| O31 | 0.704849 | 0.102237 | 0.583323 | 0.458305 | 0.375020 | 0.124980 | 0.034647 | 0.620489 | 0.821609 |
| O32 | 0.897702 | 0.102298 | 0.916667 | 0.375000 | 0.375000 | 0.375000 | 0.298687 | 0.879511 | 0.321609 |
| O33 | 0.897763 | 0.295151 | 0.750010 | 0.708305 | 0.125020 | 0.125020 | 0.413655 | 0.551959 | 0.178422 |
| O34 | 0.795151 | 0.397763 | 0.583323 | 0.708305 | 0.625020 | 0.625020 | 0.586345 | 0.948041 | 0.678422 |
| O35 | 0.602298 | 0.397702 | 0.916667 | 0.875000 | 0.125000 | 0.625000 | 0.465353 | 0.870489 | 0.428391 |
| O36 | 0.602237 | 0.204849 | 0.750010 | 0.875000 | 0.625000 | 0.125000 | 0.534647 | 0.629511 | 0.928391 |
| O37 | 0.204849 | 0.602237 | 0.583323 | 0.958305 | 0.375020 | 0.624980 | 0.419678 | 0.801959 | 0.071578 |
| O38 | 0.397702 | 0.602298 | 0.916667 | 0.958305 | 0.875020 | 0.124980 | 0.580322 | 0.698041 | 0.571578 |
| O39 | 0.397763 | 0.795151 | 0.750010 | 0.791695 | 0.874980 | 0.625020 | 0.367980 | 0.620489 | 0.821609 |
| O40 | 0.295151 | 0.897763 | 0.583323 | 0.791695 | 0.625020 | 0.874980 | 0.632020 | 0.879511 | 0.321609 |
| O41 | 0.102298 | 0.897702 | 0.916667 | 0.791695 | 0.125020 | 0.374980 | 0.746988 | 0.551959 | 0.178422 |
| O42 | 0.102237 | 0.704849 | 0.750010 | 0.958305 | 0.624980 | 0.375020 | 0.919678 | 0.948041 | 0.678422 |
| O43 | 0.704849 | 0.602237 | 0.583323 | 0.875000 | 0.875000 | 0.375000 | 0.798687 | 0.870489 | 0.428391 |
| O44 | 0.897702 | 0.602298 | 0.916667 | 0.875000 | 0.375000 | 0.875000 | 0.867980 | 0.629511 | 0.928391 |
| O45 | 0.897763 | 0.795151 | 0.750010 | 0.708305 | 0.874980 | 0.874980 | 0.753012 | 0.801959 | 0.071578 |
| O46 | 0.795151 | 0.897763 | 0.583323 | 0.958305 | 0.124980 | 0.875020 | 0.913655 | 0.698041 | 0.571578 |
| O47 | 0.602298 | 0.897702 | 0.916667 | 0.791695 | 0.374980 | 0.125020 | 0.701313 | 0.620489 | 0.821609 |
| O48 | 0.602237 | 0.704849 | 0.750010 | 0.708305 | 0.374980 | 0.374980 | 0.965353 | 0.879511 | 0.321609 |

**Table S2** The xyz coordinates for transition state structures in Ti<sup>4+</sup> substituted SiO<sub>2</sub> phases, Ti-S-TS1 was the transition state between Ti<sup>4+</sup> substituted  $\alpha$ -quartz and Ti<sup>4+</sup> substituted  $\beta$ -quartz, Ti-S-TS2 was the transition state between Ti<sup>4+</sup> substituted  $\beta$ -quartz and Ti<sup>4+</sup> substituted  $\beta$ -cristobalite, Ti-S-TS3 was the transition state between Ti<sup>4+</sup> substituted  $\beta$ -cristobalite and Ti<sup>4+</sup> substituted  $\alpha$ -cristobalite.

| Atom number | Ti-S-TS1  |           |          | Ti-S-TS2  |          |          | Ti-S-TS3 |          |           |
|-------------|-----------|-----------|----------|-----------|----------|----------|----------|----------|-----------|
|             | x         | y         | z        | x         | y        | z        | x        | y        | z         |
| Si1         | 0.249951  | -0.000117 | 0.000328 | -0.000004 | 0.000000 | 0.000000 | 0.095954 | 0.144015 | 0.000007  |
| Si2         | -0.000117 | 0.249951  | 0.333005 | -0.000005 | 0.500000 | 0.500000 | 0.237382 | 0.355993 | 0.499929  |
| Si3         | 0.250000  | 0.250000  | 0.166667 | 0.166655  | 0.000000 | 0.500000 | 0.070717 | 0.394013 | 0.250002  |
| Si4         | 0.749736  | -0.000279 | 0.000460 | 0.166655  | 0.500000 | 0.000000 | 0.262610 | 0.105985 | 0.749986  |
| Si5         | 0.500117  | 0.250049  | 0.333005 | 0.249306  | 0.247938 | 0.752062 | 0.429278 | 0.143997 | 0.000004  |
| Si6         | 0.750000  | 0.250000  | 0.166691 | 0.083333  | 0.250000 | 0.250000 | 0.403765 | 0.394078 | 0.249848  |
| Si7         | 0.250049  | 0.500117  | 0.000328 | 0.083333  | 0.750000 | 0.750000 | 0.596000 | 0.105571 | 0.750162  |
| Si8         | -0.000279 | 0.749736  | 0.332874 | 0.249306  | 0.752062 | 0.247938 | 0.762631 | 0.144034 | 0.000017  |
| Si9         | 0.250000  | 0.750000  | 0.166643 | 0.333339  | 0.000000 | 0.000000 | 0.904054 | 0.355981 | 0.500017  |
| Si10        | 0.750264  | 0.500279  | 0.000460 | 0.500006  | 0.000000 | 0.500000 | 0.737559 | 0.394092 | 0.249461  |
| Si11        | 0.500279  | 0.750264  | 0.332874 | 0.500006  | 0.500000 | 0.000000 | 0.929288 | 0.105978 | 0.750005  |
| Si12        | 0.750000  | 0.750000  | 0.166667 | 0.583345  | 0.250000 | 0.750000 | 0.095954 | 0.644011 | 0.000005  |
| Si13        | 0.251684  | -0.007603 | 0.494756 | 0.417355  | 0.247936 | 0.247936 | 0.237374 | 0.855981 | 0.500004  |
| Si14        | -0.007603 | 0.251684  | 0.838577 | 0.417355  | 0.752064 | 0.752064 | 0.070708 | 0.894012 | 0.249995  |
| Si15        | 0.749929  | -0.000087 | 0.500232 | 0.583345  | 0.750000 | 0.250000 | 0.262617 | 0.605979 | 0.749994  |
| Si16        | 0.507603  | 0.248316  | 0.838577 | 0.666665  | 0.000000 | 0.000000 | 0.429305 | 0.644026 | -0.000011 |
| Si17        | 0.750000  | 0.250000  | 0.666589 | 0.666666  | 0.500000 | 0.500000 | 0.570714 | 0.856022 | 0.500058  |
| Si18        | 0.248316  | 0.507603  | 0.494756 | 0.833339  | 0.000000 | 0.500000 | 0.404041 | 0.893995 | 0.249998  |
| Si19        | -0.000087 | 0.749929  | 0.833102 | 0.833339  | 0.500000 | 0.000000 | 0.596007 | 0.606281 | 0.750530  |
| Si20        | 0.250000  | 0.750000  | 0.666744 | 0.916659  | 0.250003 | 0.749997 | 0.762614 | 0.644005 | 0.000002  |
| Si21        | 0.750071  | 0.500087  | 0.500232 | 0.750003  | 0.250003 | 0.250003 | 0.904041 | 0.855981 | 0.500003  |
| Si22        | 0.500087  | 0.750071  | 0.833102 | 0.750003  | 0.749997 | 0.749997 | 0.737378 | 0.894000 | 0.249988  |
| Si23        | 0.750000  | 0.750000  | 0.666667 | 0.916659  | 0.749997 | 0.250003 | 0.929286 | 0.605990 | 0.750009  |
| Ti1         | 0.250000  | 0.250000  | 0.666667 | 0.333333  | 0.500000 | 0.500000 | 0.570847 | 0.356182 | 0.500057  |
| O1          | 0.211795  | 0.105668  | 0.083430 | 0.041702  | 0.124947 | 0.124947 | 0.082587 | 0.039812 | 0.167947  |
| O2          | 0.395166  | 0.106425  | 0.416089 | 0.041737  | 0.624949 | 0.624949 | 0.250746 | 0.460189 | 0.667962  |
| O3          | 0.394332  | 0.288205  | 0.249903 | 0.208246  | 0.124862 | 0.624963 | 0.140244 | 0.373912 | 0.417711  |
| O4          | 0.288205  | 0.394332  | 0.083430 | 0.208246  | 0.624963 | 0.124862 | 0.193091 | 0.126082 | 0.917710  |
| O5          | 0.104834  | 0.393575  | 0.416089 | 0.288939  | 0.366547 | 0.633453 | 0.084077 | 0.289811 | 0.082051  |
| O6          | 0.105668  | 0.211795  | 0.249903 | 0.291727  | 0.875111 | 0.124889 | 0.249260 | 0.210172 | 0.582068  |
| O7          | 0.711628  | 0.105625  | 0.083418 | 0.125000  | 0.874975 | 0.625009 | 0.026416 | 0.123911 | 0.832285  |
| O8          | 0.894183  | 0.106091  | 0.416739 | 0.125000  | 0.625009 | 0.874975 | 0.306810 | 0.376072 | 0.332275  |

|     |          |          |          |          |          |          |          |          |          |
|-----|----------|----------|----------|----------|----------|----------|----------|----------|----------|
| O9  | 0.894310 | 0.288204 | 0.249936 | 0.125000 | 0.125025 | 0.374991 | 0.415926 | 0.039822 | 0.167946 |
| O10 | 0.788372 | 0.394375 | 0.083418 | 0.288939 | 0.633453 | 0.366547 | 0.584911 | 0.466391 | 0.677449 |
| O11 | 0.605817 | 0.393909 | 0.416739 | 0.208246 | 0.875138 | 0.375037 | 0.467855 | 0.375000 | 0.412541 |
| O12 | 0.605690 | 0.211796 | 0.249936 | 0.208246 | 0.375037 | 0.875138 | 0.526411 | 0.126115 | 0.917741 |
| O13 | 0.211796 | 0.605690 | 0.083397 | 0.041702 | 0.875053 | 0.875053 | 0.417435 | 0.289798 | 0.082025 |
| O14 | 0.395156 | 0.607903 | 0.415049 | 0.291727 | 0.124889 | 0.875111 | 0.583300 | 0.201581 | 0.587187 |
| O15 | 0.394375 | 0.788372 | 0.249915 | 0.125000 | 0.374991 | 0.125025 | 0.359764 | 0.123915 | 0.832293 |
| O16 | 0.288204 | 0.894310 | 0.083397 | 0.041737 | 0.375051 | 0.375051 | 0.644389 | 0.377345 | 0.322735 |
| O17 | 0.104844 | 0.892097 | 0.415049 | 0.374973 | 0.124840 | 0.124840 | 0.749248 | 0.039811 | 0.167954 |
| O18 | 0.105625 | 0.711628 | 0.249915 | 0.377764 | 0.633397 | 0.633397 | 0.917403 | 0.460178 | 0.667938 |
| O19 | 0.711798 | 0.605632 | 0.083349 | 0.541699 | 0.124974 | 0.624958 | 0.806893 | 0.373908 | 0.417732 |
| O20 | 0.894067 | 0.605985 | 0.416578 | 0.541699 | 0.624958 | 0.124974 | 0.859752 | 0.126079 | 0.917706 |
| O21 | 0.894368 | 0.788202 | 0.249984 | 0.624962 | 0.375000 | 0.625000 | 0.750779 | 0.289732 | 0.081970 |
| O22 | 0.788202 | 0.894368 | 0.083349 | 0.624997 | 0.875002 | 0.124998 | 0.915916 | 0.210188 | 0.582046 |
| O23 | 0.605933 | 0.894015 | 0.416578 | 0.458354 | 0.875239 | 0.624861 | 0.693095 | 0.123932 | 0.832312 |
| O24 | 0.605632 | 0.711798 | 0.249984 | 0.458354 | 0.624861 | 0.875239 | 0.973569 | 0.376083 | 0.332296 |
| O25 | 0.203949 | 0.090798 | 0.575865 | 0.458354 | 0.124761 | 0.375139 | 0.082585 | 0.539814 | 0.167946 |
| O26 | 0.393575 | 0.104834 | 0.917245 | 0.624962 | 0.625000 | 0.375000 | 0.250749 | 0.960184 | 0.667950 |
| O27 | 0.409202 | 0.296051 | 0.757468 | 0.541699 | 0.875026 | 0.375042 | 0.140249 | 0.873911 | 0.417715 |
| O28 | 0.296051 | 0.409202 | 0.575865 | 0.541699 | 0.375042 | 0.875026 | 0.193089 | 0.626086 | 0.917710 |
| O29 | 0.106425 | 0.395166 | 0.917245 | 0.374973 | 0.875160 | 0.875160 | 0.084078 | 0.789814 | 0.082054 |
| O30 | 0.090798 | 0.203949 | 0.757468 | 0.624997 | 0.124998 | 0.875002 | 0.249257 | 0.710185 | 0.582053 |
| O31 | 0.711717 | 0.105736 | 0.583264 | 0.458354 | 0.375139 | 0.124761 | 0.026417 | 0.623911 | 0.832285 |
| O32 | 0.892097 | 0.104844 | 0.918284 | 0.377764 | 0.366603 | 0.366603 | 0.306919 | 0.876087 | 0.332284 |
| O33 | 0.893261 | 0.288978 | 0.749765 | 0.708298 | 0.125052 | 0.125052 | 0.415936 | 0.539834 | 0.167921 |
| O34 | 0.788283 | 0.394264 | 0.583264 | 0.708332 | 0.625048 | 0.625048 | 0.584069 | 0.960006 | 0.667935 |
| O35 | 0.607903 | 0.395156 | 0.918284 | 0.875000 | 0.125003 | 0.625000 | 0.473578 | 0.873914 | 0.417705 |
| O36 | 0.606739 | 0.211022 | 0.749765 | 0.875000 | 0.624999 | 0.125003 | 0.526366 | 0.626141 | 0.917796 |
| O37 | 0.211022 | 0.606739 | 0.583569 | 0.958268 | 0.375053 | 0.624947 | 0.417409 | 0.789825 | 0.082063 |
| O38 | 0.393909 | 0.605817 | 0.916594 | 0.958302 | 0.875050 | 0.124950 | 0.582585 | 0.710141 | 0.582067 |
| O39 | 0.394264 | 0.788283 | 0.750070 | 0.791700 | 0.874947 | 0.625050 | 0.359755 | 0.623911 | 0.832286 |
| O40 | 0.288978 | 0.893261 | 0.583569 | 0.791700 | 0.625050 | 0.874947 | 0.640243 | 0.876076 | 0.332282 |
| O41 | 0.106091 | 0.894183 | 0.916594 | 0.791700 | 0.125053 | 0.374950 | 0.749282 | 0.539883 | 0.167929 |
| O42 | 0.105736 | 0.711717 | 0.750070 | 0.958268 | 0.624947 | 0.375053 | 0.917409 | 0.960184 | 0.667946 |
| O43 | 0.711714 | 0.605530 | 0.583292 | 0.875000 | 0.874997 | 0.375000 | 0.806907 | 0.873913 | 0.417711 |
| O44 | 0.894015 | 0.605933 | 0.916756 | 0.875000 | 0.375001 | 0.874997 | 0.859756 | 0.626084 | 0.917705 |
| O45 | 0.894470 | 0.788286 | 0.750041 | 0.708298 | 0.874948 | 0.874948 | 0.750741 | 0.789828 | 0.082064 |
| O46 | 0.788286 | 0.894470 | 0.583292 | 0.958302 | 0.124950 | 0.875050 | 0.915917 | 0.710183 | 0.582051 |
| O47 | 0.605985 | 0.894067 | 0.916756 | 0.791700 | 0.374950 | 0.125053 | 0.693129 | 0.623958 | 0.832307 |
| O48 | 0.605530 | 0.711714 | 0.750041 | 0.708332 | 0.374952 | 0.374952 | 0.973576 | 0.876084 | 0.332289 |



**Table S3** The xyz coordinates for transition state structures in Al<sup>3+</sup>/Li<sup>+</sup> substituted SiO<sub>2</sub> phases, Al-S-TS1 was the transition state between Al<sup>3+</sup>/Li<sup>+</sup> substituted  $\alpha$ -quartz and Al<sup>3+</sup>/Li<sup>+</sup> substituted  $\beta$ -quartz, Al-S-TS2 was the transition state between Al<sup>3+</sup>/Li<sup>+</sup> substituted  $\beta$ -quartz and Al<sup>3+</sup>/Li<sup>+</sup> substituted  $\beta$ -cristobalite, Al-S-TS3 was the transition state between Al<sup>3+</sup>/Li<sup>+</sup> substituted  $\beta$ -cristobalite and Al<sup>3+</sup>/Li<sup>+</sup> substituted  $\alpha$ -cristobalite.

| Atom<br>number | Al-S-TS1  |           |           | Al-S-TS2 |          |           | Al-S-TS3 |          |           |
|----------------|-----------|-----------|-----------|----------|----------|-----------|----------|----------|-----------|
|                | x         | y         | z         | x        | y        | z         | x        | y        | z         |
| Si1            | 0.250486  | 0.000583  | -0.000424 | 0.000514 | 0.000015 | -0.000013 | 0.095471 | 0.143963 | 0.000030  |
| Si2            | -0.000058 | 0.249628  | 0.332891  | 0.000510 | 0.500015 | 0.499986  | 0.236291 | 0.356171 | 0.498777  |
| Si3            | 0.249805  | 0.249918  | 0.166381  | 0.167107 | 0.000012 | 0.499989  | 0.070147 | 0.394071 | 0.249840  |
| Si4            | 0.750619  | 0.000756  | -0.000103 | 0.167107 | 0.500013 | -0.000010 | 0.262048 | 0.105103 | 0.750543  |
| Si5            | 0.498323  | 0.247549  | 0.332551  | 0.249478 | 0.249374 | 0.750627  | 0.430268 | 0.143248 | 0.001258  |
| Si6            | 0.750307  | 0.250052  | 0.166296  | 0.083853 | 0.250042 | 0.250013  | 0.404957 | 0.394587 | 0.249677  |
| Si7            | 0.249049  | 0.499157  | -0.000449 | 0.083853 | 0.749988 | 0.749959  | 0.596484 | 0.106970 | 0.747488  |
| Si8            | 0.001394  | 0.751539  | 0.332570  | 0.249478 | 0.750652 | 0.249349  | 0.762335 | 0.144539 | 0.000238  |
| Si9            | 0.249625  | 0.749877  | 0.166399  | 0.332295 | 0.000020 | -0.000023 | 0.903384 | 0.356042 | 0.499884  |
| Si10           | 0.749645  | 0.499554  | -0.000189 | 0.499277 | 0.000306 | 0.500078  | 0.735836 | 0.393768 | 0.250919  |
| Si11           | 0.500341  | 0.751172  | 0.332358  | 0.499277 | 0.499930 | -0.000323 | 0.928841 | 0.106059 | 0.749978  |
| Si12           | 0.750128  | 0.749995  | 0.166426  | 0.583851 | 0.248353 | 0.751654  | 0.095546 | 0.644082 | -0.000045 |
| Si13           | 0.249685  | -0.001482 | 0.499379  | 0.415447 | 0.245624 | 0.245764  | 0.237264 | 0.855963 | 0.499467  |
| Si14           | -0.001296 | 0.250085  | 0.834258  | 0.415451 | 0.754225 | 0.754366  | 0.070367 | 0.893961 | 0.250029  |
| Si15           | 0.750298  | 0.001122  | 0.499760  | 0.583975 | 0.751882 | 0.248125  | 0.262431 | 0.607007 | 0.750583  |
| Si16           | 0.501306  | 0.249897  | 0.834209  | 0.667085 | 0.000055 | -0.000053 | 0.430118 | 0.644367 | 0.000219  |
| Si17           | 0.749925  | 0.249070  | 0.668413  | 0.667570 | 0.499953 | 0.500050  | 0.571181 | 0.855910 | 0.500548  |
| Si18           | 0.245195  | 0.501514  | 0.498150  | 0.833854 | 0.000011 | 0.499989  | 0.404403 | 0.893762 | 0.250314  |
| Si19           | 0.001097  | 0.750029  | 0.833924  | 0.833854 | 0.500013 | -0.000009 | 0.596334 | 0.604343 | 0.748943  |
| Si20           | 0.249985  | 0.750777  | 0.666443  | 0.917176 | 0.250018 | 0.749983  | 0.762326 | 0.643607 | 0.000332  |
| Si21           | 0.755626  | 0.498631  | 0.498103  | 0.750520 | 0.249904 | 0.249874  | 0.903722 | 0.855953 | 0.500105  |
| Si22           | 0.498998  | 0.750290  | 0.834095  | 0.750520 | 0.750127 | 0.750098  | 0.737333 | 0.894106 | 0.249709  |
| Si23           | 0.754917  | 0.756268  | 0.669255  | 0.917176 | 0.750013 | 0.249988  | 0.928854 | 0.605895 | 0.750020  |
| Al1            | 0.245418  | 0.244546  | 0.669084  | 0.331652 | 0.499989 | 0.500020  | 0.573279 | 0.356315 | 0.498771  |
| Li1            | 0.500894  | 0.500456  | 0.570584  | 0.491453 | 0.506405 | 0.492929  | 0.421443 | 0.337902 | 0.634751  |
| O1             | 0.211441  | 0.105270  | 0.083691  | 0.041447 | 0.125184 | 0.125154  | 0.082711 | 0.039894 | 0.167876  |
| O2             | 0.395160  | 0.105268  | 0.416094  | 0.041563 | 0.625160 | 0.625130  | 0.251169 | 0.459600 | 0.667872  |
| O3             | 0.394595  | 0.289247  | 0.250076  | 0.207970 | 0.124206 | 0.625759  | 0.140663 | 0.373842 | 0.418202  |

|     |          |          |          |          |          |          |          |          |          |
|-----|----------|----------|----------|----------|----------|----------|----------|----------|----------|
| O4  | 0.288854 | 0.394859 | 0.083765 | 0.207969 | 0.625790 | 0.124179 | 0.193430 | 0.126136 | 0.917315 |
| O5  | 0.104141 | 0.393802 | 0.415525 | 0.290255 | 0.368572 | 0.631428 | 0.084238 | 0.289798 | 0.082045 |
| O6  | 0.105744 | 0.211669 | 0.250039 | 0.291830 | 0.875624 | 0.124379 | 0.249603 | 0.210518 | 0.582010 |
| O7  | 0.710878 | 0.105063 | 0.083812 | 0.124762 | 0.875133 | 0.624799 | 0.026747 | 0.123954 | 0.832548 |
| O8  | 0.893998 | 0.105714 | 0.416456 | 0.124762 | 0.624828 | 0.875108 | 0.306762 | 0.375908 | 0.333062 |
| O9  | 0.894245 | 0.288434 | 0.250169 | 0.124762 | 0.124894 | 0.375174 | 0.415745 | 0.040079 | 0.167677 |
| O10 | 0.788760 | 0.394728 | 0.083839 | 0.290266 | 0.631460 | 0.368540 | 0.583858 | 0.463952 | 0.673490 |
| O11 | 0.603863 | 0.396026 | 0.419005 | 0.207969 | 0.875822 | 0.374212 | 0.469553 | 0.374483 | 0.414343 |
| O12 | 0.606549 | 0.212539 | 0.250270 | 0.207970 | 0.374243 | 0.875796 | 0.525647 | 0.126233 | 0.918600 |
| O13 | 0.212013 | 0.605713 | 0.083550 | 0.041447 | 0.874847 | 0.874818 | 0.417177 | 0.289851 | 0.081421 |
| O14 | 0.396755 | 0.606203 | 0.417869 | 0.291827 | 0.124408 | 0.875595 | 0.582252 | 0.205349 | 0.586060 |
| O15 | 0.393851 | 0.788269 | 0.249963 | 0.124762 | 0.375202 | 0.124869 | 0.359761 | 0.124512 | 0.831377 |
| O16 | 0.288370 | 0.894544 | 0.083505 | 0.041563 | 0.374872 | 0.374842 | 0.642757 | 0.376830 | 0.326967 |
| O17 | 0.105644 | 0.892543 | 0.415638 | 0.375597 | 0.123448 | 0.123415 | 0.749301 | 0.039618 | 0.168038 |
| O18 | 0.105360 | 0.710841 | 0.249848 | 0.378271 | 0.628027 | 0.627846 | 0.917588 | 0.460268 | 0.668042 |
| O19 | 0.711627 | 0.605515 | 0.083531 | 0.541738 | 0.127046 | 0.624037 | 0.807550 | 0.373858 | 0.418161 |
| O20 | 0.895135 | 0.606997 | 0.416054 | 0.541666 | 0.623993 | 0.127408 | 0.860045 | 0.125974 | 0.917428 |
| O21 | 0.893881 | 0.787892 | 0.250203 | 0.624185 | 0.375853 | 0.624147 | 0.751047 | 0.289365 | 0.081400 |
| O22 | 0.788074 | 0.894406 | 0.083504 | 0.625093 | 0.875487 | 0.124514 | 0.916072 | 0.210076 | 0.582151 |
| O23 | 0.606161 | 0.893997 | 0.417111 | 0.459351 | 0.872768 | 0.624867 | 0.693165 | 0.123705 | 0.832675 |
| O24 | 0.605828 | 0.711249 | 0.250435 | 0.459335 | 0.625103 | 0.872893 | 0.973992 | 0.376122 | 0.331987 |
| O25 | 0.207829 | 0.097089 | 0.577548 | 0.459337 | 0.127127 | 0.374902 | 0.082720 | 0.539790 | 0.167970 |
| O26 | 0.394422 | 0.104986 | 0.917469 | 0.624120 | 0.624135 | 0.375864 | 0.250827 | 0.960499 | 0.668146 |
| O27 | 0.406151 | 0.295781 | 0.752531 | 0.541666 | 0.872600 | 0.376002 | 0.140435 | 0.873904 | 0.417936 |
| O28 | 0.298184 | 0.406716 | 0.577547 | 0.541738 | 0.375959 | 0.872963 | 0.193331 | 0.625937 | 0.917369 |
| O29 | 0.105175 | 0.395067 | 0.917629 | 0.375597 | 0.876585 | 0.876552 | 0.084187 | 0.789784 | 0.082025 |
| O30 | 0.095613 | 0.207793 | 0.754875 | 0.625071 | 0.124603 | 0.875398 | 0.249293 | 0.709929 | 0.582217 |
| O31 | 0.711426 | 0.105677 | 0.582964 | 0.459354 | 0.375137 | 0.127250 | 0.026721 | 0.623948 | 0.832532 |
| O32 | 0.892552 | 0.105611 | 0.917772 | 0.378274 | 0.372159 | 0.371978 | 0.306796 | 0.876113 | 0.332439 |
| O33 | 0.893622 | 0.289442 | 0.750250 | 0.708081 | 0.125232 | 0.125225 | 0.415687 | 0.539583 | 0.167863 |
| O34 | 0.788569 | 0.394023 | 0.583833 | 0.708224 | 0.625363 | 0.625301 | 0.583939 | 0.959708 | 0.668046 |
| O35 | 0.607448 | 0.394608 | 0.917457 | 0.874720 | 0.125233 | 0.625195 | 0.473200 | 0.874017 | 0.417282 |
| O36 | 0.606491 | 0.211146 | 0.749898 | 0.874718 | 0.625225 | 0.125203 | 0.525763 | 0.626393 | 0.918555 |
| O37 | 0.210802 | 0.606620 | 0.583396 | 0.957907 | 0.375311 | 0.624691 | 0.417247 | 0.789835 | 0.082012 |
| O38 | 0.394251 | 0.605725 | 0.916642 | 0.958038 | 0.875264 | 0.124737 | 0.582442 | 0.710678 | 0.581828 |

|     |          |          |          |          |          |          |          |          |          |
|-----|----------|----------|----------|----------|----------|----------|----------|----------|----------|
| O39 | 0.394512 | 0.788046 | 0.749503 | 0.791465 | 0.875123 | 0.624777 | 0.359544 | 0.623481 | 0.831772 |
| O40 | 0.289281 | 0.893163 | 0.582587 | 0.791464 | 0.624804 | 0.875098 | 0.640148 | 0.876077 | 0.332309 |
| O41 | 0.105680 | 0.894004 | 0.916924 | 0.791464 | 0.124904 | 0.375198 | 0.749542 | 0.540373 | 0.167386 |
| O42 | 0.105266 | 0.711281 | 0.749868 | 0.957900 | 0.624714 | 0.375288 | 0.917521 | 0.960178 | 0.667930 |
| O43 | 0.709313 | 0.604752 | 0.582895 | 0.874718 | 0.874798 | 0.374777 | 0.807074 | 0.873890 | 0.417869 |
| O44 | 0.894060 | 0.606241 | 0.916593 | 0.874720 | 0.374806 | 0.874769 | 0.860039 | 0.626120 | 0.917407 |
| O45 | 0.895199 | 0.787717 | 0.750242 | 0.708081 | 0.874777 | 0.874769 | 0.750779 | 0.789967 | 0.082141 |
| O46 | 0.787737 | 0.893784 | 0.582316 | 0.958039 | 0.124766 | 0.875235 | 0.916033 | 0.710218 | 0.582031 |
| O47 | 0.606261 | 0.893885 | 0.916555 | 0.791465 | 0.375225 | 0.124878 | 0.693219 | 0.624228 | 0.832533 |
| O48 | 0.604010 | 0.709228 | 0.747701 | 0.708224 | 0.374700 | 0.374639 | 0.973826 | 0.876128 | 0.332063 |

**Table S4** The xyz coordinates for transition state structures in 4H<sup>+</sup> substituted SiO<sub>2</sub> phases, H-S-TS1 was the transition state between 4H<sup>+</sup> substituted  $\alpha$ -quartz and 4H<sup>+</sup> substituted  $\beta$ -quartz, H-S-TS2 was the transition state between 4H<sup>+</sup> substituted  $\beta$ -quartz and 4H<sup>+</sup> substituted  $\beta$ -cristobalite, H-S-TS3 was the transition state between 4H<sup>+</sup> substituted  $\beta$ -cristobalite and 4H<sup>+</sup> substituted  $\alpha$ -cristobalite.

| Atom<br>number | H-S-TS1   |           |          | H-S-TS2   |           |           | H-S-TS3  |          |           |
|----------------|-----------|-----------|----------|-----------|-----------|-----------|----------|----------|-----------|
|                | x         | y         | z        | x         | y         | z         | x        | y        | z         |
| Si1            | 0.250515  | 0.000512  | 0.000381 | -0.000045 | -0.000036 | -0.000036 | 0.095789 | 0.143981 | -0.000041 |
| Si2            | 0.000474  | 0.250218  | 0.333241 | -0.000017 | 0.499923  | 0.499923  | 0.237012 | 0.355676 | 0.499589  |
| Si3            | 0.249453  | 0.249393  | 0.166467 | 0.166531  | 0.000274  | 0.499656  | 0.070496 | 0.394016 | 0.250029  |
| Si4            | 0.749342  | 0.000288  | 0.000516 | 0.166531  | 0.499656  | 0.000274  | 0.262584 | 0.105916 | 0.750106  |
| Si5            | 0.501587  | 0.250394  | 0.332445 | 0.249779  | 0.249538  | 0.750794  | 0.429690 | 0.143387 | 0.000121  |
| Si6            | 0.749708  | 0.249250  | 0.166411 | 0.083428  | 0.250055  | 0.250055  | 0.403403 | 0.394110 | 0.248622  |
| Si7            | 0.249810  | 0.500512  | 0.000038 | 0.083358  | 0.750037  | 0.750037  | 0.596155 | 0.106364 | 0.749317  |
| Si8            | -0.000130 | 0.749339  | 0.332333 | 0.249779  | 0.750794  | 0.249538  | 0.762412 | 0.144189 | 0.000010  |
| Si9            | 0.249621  | 0.749043  | 0.166598 | 0.333143  | 0.000971  | 0.000971  | 0.903696 | 0.355897 | 0.499845  |
| Si10           | 0.749779  | 0.500415  | 0.000467 | 0.499982  | 0.000494  | 0.499219  | 0.736825 | 0.393637 | 0.250352  |
| Si11           | 0.501002  | 0.750547  | 0.332867 | 0.499982  | 0.499219  | 0.000494  | 0.929111 | 0.106120 | 0.749977  |
| Si12           | 0.749372  | 0.749348  | 0.166565 | 0.583392  | 0.250011  | 0.750051  | 0.095741 | 0.644010 | 0.000088  |
| Si13           | 0.249923  | -0.002772 | 0.495866 | 0.416577  | 0.250406  | 0.250406  | 0.237274 | 0.856125 | 0.499847  |
| Si14           | -0.002949 | 0.252139  | 0.834203 | 0.417773  | 0.753307  | 0.753307  | 0.070585 | 0.894107 | 0.250022  |
| Si15           | 0.750191  | 0.000553  | 0.500204 | 0.583392  | 0.750051  | 0.250011  | 0.262214 | 0.606268 | 0.750011  |
| Si16           | 0.499070  | 0.253760  | 0.828274 | 0.666611  | -0.000050 | -0.000050 | 0.429283 | 0.644467 | 0.000833  |
| Si17           | 0.748893  | 0.248966  | 0.666151 | 0.666641  | 0.499918  | 0.499918  | 0.570855 | 0.856731 | 0.499918  |
| Si18           | 0.246522  | 0.507992  | 0.498968 | 0.833294  | -0.000061 | 0.499938  | 0.404138 | 0.894368 | 0.250203  |
| Si19           | 0.000216  | 0.749707  | 0.833318 | 0.833294  | 0.499938  | -0.000061 | 0.596500 | 0.608838 | 0.752156  |
| Si20           | 0.249918  | 0.750526  | 0.667711 | 0.916713  | 0.250019  | 0.750019  | 0.762865 | 0.643771 | 0.000998  |
| Si21           | 0.749795  | 0.500577  | 0.500160 | 0.750052  | 0.250017  | 0.250017  | 0.903936 | 0.856006 | 0.500071  |
| Si22           | 0.500850  | 0.750021  | 0.833372 | 0.750048  | 0.750020  | 0.750020  | 0.737425 | 0.894390 | 0.249878  |
| Si23           | 0.749614  | 0.749548  | 0.666641 | 0.916713  | 0.750019  | 0.250019  | 0.929208 | 0.605894 | 0.749842  |
| H1             | 0.137579  | 0.164395  | 0.821789 | 0.300479  | 0.491396  | 0.692641  | 0.517704 | 0.437664 | 0.663173  |
| H2             | 0.313993  | 0.360553  | 0.498980 | 0.300479  | 0.692641  | 0.491396  | 0.451827 | 0.427366 | 0.535006  |
| H3             | 0.235132  | 0.068263  | 0.664017 | 0.330937  | 0.653155  | 0.653155  | 0.553847 | 0.294301 | 0.634156  |
| H4             | 0.380254  | 0.316451  | 0.670441 | 0.401083  | 0.456163  | 0.456163  | 0.630765 | 0.438812 | 0.447259  |
| O1             | 0.211149  | 0.105232  | 0.083143 | 0.041687  | 0.124929  | 0.124929  | 0.082642 | 0.039794 | 0.167946  |

|     |          |          |          |          |          |          |          |          |          |
|-----|----------|----------|----------|----------|----------|----------|----------|----------|----------|
| O2  | 0.394800 | 0.105688 | 0.415732 | 0.041736 | 0.624918 | 0.624918 | 0.250810 | 0.460201 | 0.667979 |
| O3  | 0.394476 | 0.288996 | 0.250549 | 0.208408 | 0.124585 | 0.624996 | 0.140346 | 0.373946 | 0.417803 |
| O4  | 0.288898 | 0.395030 | 0.083534 | 0.208408 | 0.624996 | 0.124585 | 0.193148 | 0.126107 | 0.917654 |
| O5  | 0.105673 | 0.394831 | 0.415575 | 0.291420 | 0.381137 | 0.631271 | 0.084147 | 0.289822 | 0.082059 |
| O6  | 0.105569 | 0.211518 | 0.250071 | 0.291660 | 0.875249 | 0.123959 | 0.249330 | 0.210314 | 0.582082 |
| O7  | 0.711086 | 0.105360 | 0.083713 | 0.125030 | 0.874985 | 0.625062 | 0.026529 | 0.123905 | 0.832375 |
| O8  | 0.893638 | 0.105191 | 0.416546 | 0.125030 | 0.625062 | 0.874985 | 0.306633 | 0.376222 | 0.332316 |
| O9  | 0.894362 | 0.288895 | 0.249664 | 0.124948 | 0.125018 | 0.374974 | 0.415798 | 0.039742 | 0.167919 |
| O10 | 0.789182 | 0.395026 | 0.083591 | 0.291420 | 0.631271 | 0.381137 | 0.581130 | 0.459477 | 0.669570 |
| O11 | 0.604707 | 0.394345 | 0.416868 | 0.208063 | 0.875896 | 0.375293 | 0.472181 | 0.376291 | 0.423951 |
| O12 | 0.605754 | 0.211437 | 0.249814 | 0.208063 | 0.375293 | 0.875896 | 0.526052 | 0.126093 | 0.918607 |
| O13 | 0.211694 | 0.605444 | 0.083457 | 0.041680 | 0.875031 | 0.875031 | 0.417526 | 0.290211 | 0.082417 |
| O14 | 0.393684 | 0.606458 | 0.415709 | 0.291660 | 0.123959 | 0.875249 | 0.580951 | 0.212277 | 0.585924 |
| O15 | 0.394299 | 0.789042 | 0.249704 | 0.124948 | 0.374974 | 0.125018 | 0.359711 | 0.124081 | 0.832328 |
| O16 | 0.288788 | 0.894335 | 0.083682 | 0.041734 | 0.375033 | 0.375033 | 0.640814 | 0.379720 | 0.335526 |
| O17 | 0.104851 | 0.892802 | 0.414818 | 0.374992 | 0.124920 | 0.124920 | 0.749306 | 0.039585 | 0.168027 |
| O18 | 0.105313 | 0.711323 | 0.250112 | 0.372650 | 0.628552 | 0.628552 | 0.917328 | 0.460315 | 0.668084 |
| O19 | 0.711666 | 0.605352 | 0.083356 | 0.541687 | 0.124856 | 0.625070 | 0.807447 | 0.374029 | 0.417926 |
| O20 | 0.894348 | 0.605721 | 0.416655 | 0.541687 | 0.625070 | 0.124856 | 0.859880 | 0.126038 | 0.917663 |
| O21 | 0.894661 | 0.788802 | 0.249904 | 0.624998 | 0.374974 | 0.624950 | 0.750794 | 0.289664 | 0.081791 |
| O22 | 0.788820 | 0.894599 | 0.083548 | 0.624992 | 0.874987 | 0.124970 | 0.916051 | 0.210145 | 0.582145 |
| O23 | 0.606132 | 0.894573 | 0.416853 | 0.458360 | 0.874443 | 0.624774 | 0.693295 | 0.123572 | 0.832855 |
| O24 | 0.605557 | 0.711244 | 0.249940 | 0.458360 | 0.624774 | 0.874443 | 0.973787 | 0.376116 | 0.332224 |
| O25 | 0.211789 | 0.094334 | 0.585320 | 0.458727 | 0.123918 | 0.375029 | 0.082667 | 0.539841 | 0.167894 |
| O26 | 0.395046 | 0.107812 | 0.915008 | 0.624998 | 0.624950 | 0.374974 | 0.250763 | 0.960162 | 0.667937 |
| O27 | 0.398809 | 0.289652 | 0.748253 | 0.541729 | 0.874741 | 0.375183 | 0.140324 | 0.873877 | 0.417755 |
| O28 | 0.293164 | 0.397972 | 0.570254 | 0.541729 | 0.375183 | 0.874741 | 0.193228 | 0.626063 | 0.917625 |
| O29 | 0.104312 | 0.394809 | 0.917792 | 0.374707 | 0.874888 | 0.874888 | 0.084141 | 0.789780 | 0.082029 |
| O30 | 0.100048 | 0.206077 | 0.759817 | 0.624992 | 0.124970 | 0.874987 | 0.249335 | 0.710056 | 0.582173 |
| O31 | 0.711205 | 0.105647 | 0.583372 | 0.458727 | 0.375029 | 0.123918 | 0.026524 | 0.623935 | 0.832382 |
| O32 | 0.893430 | 0.106135 | 0.918196 | 0.377692 | 0.378261 | 0.378261 | 0.306919 | 0.876015 | 0.332299 |
| O33 | 0.894450 | 0.290307 | 0.748594 | 0.708294 | 0.125021 | 0.125021 | 0.415849 | 0.539960 | 0.167492 |
| O34 | 0.789140 | 0.394301 | 0.583606 | 0.708318 | 0.625009 | 0.625009 | 0.584120 | 0.959533 | 0.667842 |
| O35 | 0.605331 | 0.392952 | 0.916789 | 0.874991 | 0.124972 | 0.624976 | 0.473498 | 0.873690 | 0.417627 |
| O36 | 0.606266 | 0.210350 | 0.750537 | 0.874991 | 0.624976 | 0.124972 | 0.526132 | 0.626020 | 0.917631 |

|     |          |          |          |          |          |          |          |          |          |
|-----|----------|----------|----------|----------|----------|----------|----------|----------|----------|
| O37 | 0.209434 | 0.608237 | 0.585973 | 0.958299 | 0.375040 | 0.624938 | 0.417386 | 0.789656 | 0.081893 |
| O38 | 0.394368 | 0.606143 | 0.917078 | 0.958295 | 0.875019 | 0.124929 | 0.582518 | 0.709660 | 0.582180 |
| O39 | 0.394599 | 0.788630 | 0.749863 | 0.791699 | 0.874900 | 0.625032 | 0.359952 | 0.623627 | 0.831932 |
| O40 | 0.289434 | 0.893779 | 0.583429 | 0.791699 | 0.625032 | 0.874900 | 0.640183 | 0.875744 | 0.332397 |
| O41 | 0.105705 | 0.895231 | 0.915708 | 0.791704 | 0.125037 | 0.374930 | 0.749620 | 0.540589 | 0.167143 |
| O42 | 0.105543 | 0.711243 | 0.749828 | 0.958299 | 0.624938 | 0.375040 | 0.917458 | 0.960135 | 0.667901 |
| O43 | 0.711346 | 0.605486 | 0.583358 | 0.875000 | 0.875009 | 0.374983 | 0.806935 | 0.873839 | 0.417710 |
| O44 | 0.894110 | 0.605391 | 0.917221 | 0.875000 | 0.374983 | 0.875009 | 0.859766 | 0.626163 | 0.917498 |
| O45 | 0.894658 | 0.788895 | 0.749701 | 0.708287 | 0.874936 | 0.874936 | 0.750689 | 0.789747 | 0.081839 |
| O46 | 0.788529 | 0.894214 | 0.583203 | 0.958295 | 0.124929 | 0.875019 | 0.915960 | 0.710202 | 0.582086 |
| O47 | 0.605220 | 0.893689 | 0.916389 | 0.791704 | 0.374930 | 0.125037 | 0.692847 | 0.623621 | 0.831480 |
| O48 | 0.605451 | 0.711533 | 0.750008 | 0.708357 | 0.374933 | 0.374933 | 0.973662 | 0.876079 | 0.332244 |

**Table S5** The lattice parameters for transition state structures in Tables S1-S4

| Structure | Lattice parameters |              |              |              |             |              |
|-----------|--------------------|--------------|--------------|--------------|-------------|--------------|
|           | <i>a</i> (Å)       | <i>b</i> (Å) | <i>c</i> (Å) | $\alpha$ (°) | $\beta$ (°) | $\gamma$ (°) |
| TS1       | 10.169             | 10.169       | 11.225       | 90.000       | 90.000      | 119.922      |
| TS2       | 22.263             | 7.420        | 7.420        | 90.000       | 90.000      | 90.000       |
| TS3       | 15.104             | 10.070       | 7.051        | 90.000       | 90.000      | 90.000       |
| Ti-S-TS1  | 10.231             | 10.231       | 11.241       | 90.000       | 90.000      | 120.305      |
| Ti-S-TS2  | 22.374             | 7.459        | 7.459        | 90.001       | 90.000      | 90.000       |
| Ti-S-TS3  | 15.466             | 10.309       | 7.170        | 90.062       | 89.935      | 90.015       |
| Al-S-TS1  | 10.289             | 10.210       | 11.165       | 89.967       | 90.065      | 120.217      |
| Al-S-TS2  | 22.223             | 7.442        | 7.442        | 90.150       | 89.999      | 90.000       |
| Al-S-TS3  | 15.460             | 10.288       | 7.180        | 90.108       | 90.132      | 90.001       |
| H-S-TS1   | 10.251             | 10.261       | 11.204       | 89.804       | 90.161      | 120.609      |
| H-S-TS2   | 22.366             | 7.466        | 7.466        | 90.067       | 90.075      | 90.075       |
| H-S-TS3   | 15.449             | 10.283       | 7.155        | 90.094       | 90.009      | 90.089       |
